# Supplementary material
Source: publisher figshare collection journal article supplement (https://sage.figshare.com/ndownloader/files/22131717)
Supplement: Supplementary file 1 [file 22131717]

**La clozapine et l’évolution du trouble bipolaire dans le Programme d’amélioration systématique du traitement du trouble bipolaire (STEP-BD)**

**Objectif :** Le potentiel de la clozapine dans le trouble bipolaire grave est suggéré pour son efficacité révélée dans la schizophrénie réfractaire, mais les données probantes sont limitées jusqu’ici. La présente étude utilise des données du parcours des soins standards du Programme d’amélioration systématique du traitement afin d’examiner l’impact clinique de la clozapine sur le trouble bipolaire, en le comparant à deux groupes, l’un qui a reçu de l’olanzapine, et un groupe additionnel qui n’a reçu aucun des deux médicaments.

**Méthode :** Des patients ambulatoires au nombre de 4 032 étaient disponibles pour cette analyse. Les groupes des analyses longitudinales sont basés sur le médicament utilisé à chaque visite. Les résultats évalués étaient l’état clinique, les sous-échelles de symptômes, les hospitalisations, et le décès. Nous avons utilisé des modèles mixtes et généralisé les équations d’estimation pour ajuster les différences de base et rechercher les différences longitudinales des symptômes, de l’état clinique, et des taux d’hospitalisation entre les groupes.

**Résultats :** Un pourcentage de 1,1 % (n = 43) des patients a utilisé la clozapine à tout moment de la durée de l’étude. Les patients de la clozapine avaient significativement moins de symptômes de manie et de dépression durant le suivi comparativement à ceux qui ne prenaient ni clozapine ni olanzapine, alors que ceux qui prenaient l’olanzapine avaient plus de symptômes. L’utilisation de la clozapine n’était pas associée à un risque accru d’hospitalisation. Aucun décès n’a été enregistré pour le groupe de la clozapine durant l’essai.

**Conclusions** : Même si elle n’a été prescrite qu’à peu de patients, la clozapine a eu un impact notable, et entraîné moins de symptômes chez les patients dont la maladie était plus grave au départ. La clozapine pourrait s’avérer être une intervention aussi réussie aux derniers stades du trouble bipolaire qu’elle ne l’est dans la schizophrénie.
